# Supplementary material for: Formalin-Fixed and Paraffin-Embedded Samples for Next Generation Sequencing: Problems and Solutions
Source: MDPI journal article supplement (doi:10.3390/genes12101472), 2021-09-23
Supplement: s1 [file s1]

**Table S1.** Most significant studies present in literature.

| Number of References | Author(s)              | Year | Topic(s)                          |
|----------------------|------------------------|------|-----------------------------------|
| [11]                 | Xuan, J. et Al.        | 2012 | NGS and clinic                    |
| [12]                 | Do, H. et Al.          | 2015 | NGS and artifact                  |
| [13]                 | Schweiger, M.R. et Al. | 2009 | NGS for FFPE                      |
| [17]                 | Ludyga, N. et Al.      | 2012 | Artifact of sequence              |
| [18]                 | Williams, C. et Al.    | 1999 | Mutations in FFPE                 |
| [19]                 | Quach, N. et Al.       | 2004 | Artifact and PCR                  |
| [20]                 | Ruiz, M.I.G. et Al.    | 2007 | FFPE of NSCLC                     |
| [21]                 | Murray, S. et Al.      | 2008 | Mutations in FFPE of NSCLC        |
| [22]                 | Tsao, M. et Al.        | 2005 | Erlotinib in NSCLC                |
| [23]                 | Didelot, A. et Al.     | 2013 | Multiplex digital PCR and<br>FFPE |
| [24]                 | Suzuki, T. et Al.      | 1994 | Artifacts in FFPE                 |
| [25]                 | Zsikla, V. et Al.      | 2004 | Formalin and FFPE                 |
| [26]                 | Ofner, R. et Al.       | 2017 | Artifacts in FFPE                 |
